# Supplementary material
Source: PubMed Central journal article supplement (PMC2347379)

**Table P1.** Primers used for mutant construction.

| Name                                                              | 5' Composition 3'                                  | Sequence position | orf |
|-------------------------------------------------------------------|----------------------------------------------------|-------------------|-----|
| <b>Primers to construct the in-frame deletion mutant AH-3Δ2.1</b> |                                                    |                   |     |
| 2.1-A                                                             | ACGCGTCGACCGTCTATGGCTACTCCAAGC ( <i>SalI</i> site) | 1016              | 1.1 |
| 2.1-B                                                             | CCCATCCACTAAACTTAAACAACCACGTCGGGTCAATTCGT          | 1690              | 2.1 |
| 2.1-C                                                             | TGTTTAAGTTTAGTGGATGGGGCCATTTTCCCTCGTACCGA          | 3289              | 2.1 |
| 2.1-D                                                             | ACGCGTCGACGGCTCTGGGAGAGATAAAGC ( <i>SalI</i> site) | 3953              | 3.1 |
| <b>Primers to construct the in-frame deletion mutant AH-3Δ3.1</b> |                                                    |                   |     |
| 3.1-A                                                             | ACGCGTCGACGCTATCAGGACAACCTGACG ( <i>SalI</i> site) | 2850              | 2.1 |
| 3.1-B                                                             | CCCATCCACTAAACTTAAACATGTGGTGGTTTTATCGAGCA          | 3409              | 3.1 |
| 3.1-C                                                             | TGTTTAAGTTTAGTGGATGGGTTTCTTGGCCTGCCGCTC            | 4382              | 3.1 |
| 3.1-D                                                             | ACGCGTCGACAGATATCTGGCAAGCCGATA( <i>SalI</i> site)  | 5004              | 4.1 |
| <b>Primers to construct the in-frame deletion mutant AH-3Δ4.1</b> |                                                    |                   |     |
| 4.1-A                                                             | GGAAGATCTGTGGAAATACGTTGCGGTAG ( <i>BglII</i> site) | 4021              | 3.1 |
| 4.1-B                                                             | CCCATCCACTAAACTTAAACAATCTGCTGTACAACCATCG           | 4645              | 4.1 |
| 4.1-C                                                             | TGTTTAAGTTTAGTGGATGGGCCCTCCGATTATCTGACTGGT         | 5111              | 4.1 |
| 4.1-D                                                             | GGAAGATCTGGTGGCCTTTTCGTTGAACA ( <i>BglII</i> site) | 5810              | 5.1 |
| <b>Primers to construct the in-frame deletion mutant AH-3Δ5.1</b> |                                                    |                   |     |
| 5.1-A                                                             | GGAAGATCTGTTTTGGTGAGATTGGCTGT ( <i>BglII</i> site) | 4764              | 4.1 |
| 5.1-B                                                             | CCCATCCACTAAACTTAAACACACGTTTGCCACTTCTGTT           | 5429              | 5.1 |
| 5.1-C                                                             | TGTTTAAGTTTAGTGGATGGGGACAACCTTCCGCTCTTTC           | 6294              | 5.1 |
| 5.1-D                                                             | GGAAGATCTACTCCGAGTCGATTCAACAG ( <i>BglII</i> site) | 6931              | 6.1 |
| <b>Primers to construct the defined insertion mutant AH-3Δ7.1</b> |                                                    |                   |     |
| 7.1-F                                                             | CGCTACATGAAAGACCTGC                                | 8331              | 7.1 |
| 7.1-R                                                             | CTGATCAAACACGCTTCCC                                | 7792              | 7.1 |
| <b>Primers to construct the in-frame deletion mutant AH-3Δ2.2</b> |                                                    |                   |     |
| 2.2-A                                                             | ACGCGTCGACGCACCCATTCTGACTGGAC ( <i>SalI</i> site)  | 3184              | 3.2 |
| 2.2-B                                                             | CCCATCCACTAAACTTAAACAGAGGCTCTGGGACATCACC           | 2643              | 2.2 |
| 2.2-C                                                             | TGTTTAAGTTTAGTGGATGGGCCGGAGCAGGTGATAGAG            | 1715              | 2.2 |
| 2.2-D                                                             | ACGCGTCGACGGGCATTGATGATGGTCAC ( <i>SalI</i> site)  | 1126              | 1.2 |
| <b>Primers to construct the defined insertion mutant AH-3Δ4.2</b> |                                                    |                   |     |
| 4.2-F                                                             | AGTTTTGCCATGCTCAAGC                                | 4777              | 4.2 |
| 4.2-R                                                             | CAGTATGCACTGCAACTCG                                | 4178              | 4.2 |

**Table P2.** Primers used for mutant complementation with different plasmid vectors.

| Name                                              | 5' Composition 3'                                  | Sequence position | orf       |
|---------------------------------------------------|----------------------------------------------------|-------------------|-----------|
| <b>COMPLEMENTATION WITH pBAD33</b>                |                                                    |                   |           |
| <b>Primers to complement the mutant AH-3Δ2.1</b>  |                                                    |                   |           |
| 2.1-F                                             | TCCCCCGGGGTTTGATCCCCCTCTGAC ( <i>Sma</i> I site)   | 1544              | 1.1       |
| 2.1-R                                             | CTAGTCTAGAATGGTCAATGCAAACAGGG ( <i>Xba</i> I site) | 3429              | 3.1       |
| <b>Primers to complement the mutant AH-3Δ3.1</b>  |                                                    |                   |           |
| 3.1-F                                             | TCCCCCGGGTTTCCCTCGTACCGATGTT ( <i>Sma</i> I site)  | 3295              | 2.1       |
| 3.1-R                                             | CTAGTCTAGAACACTTCTTTGGCCACGTC ( <i>Xba</i> I site) | 4748              | 4.1       |
| <b>Primers to complement the mutant AH-3Δ4.1</b>  |                                                    |                   |           |
| 4.1-F                                             | TCCCCCGGGTTTCTGCAGGGGTACTGGT ( <i>Sma</i> I site)  | 4428              | 3.1       |
| 4.1-R                                             | CTAGTCTAGACGTTTGCCACTTCTGTTC ( <i>Xba</i> I site)  | 5427              | 5.1       |
| <b>Primers to complement the mutant AH-3Δ5.1</b>  |                                                    |                   |           |
| 5.1-F                                             | TCCCCCGGGGGGATTGGGGTCAGTAAAC ( <i>Sma</i> I site)  | 5259              | 5' of 5.1 |
| 5.1-R                                             | CTAGTCTAGACTTGAGTTGCAGGTCGTTG ( <i>Xba</i> I site) | 6440              | 6.1       |
| <b>Primers to complement the mutant AH-3Δ6.1</b>  |                                                    |                   |           |
| 6.1-F                                             | TCCCCCGGGAACCTTCCGCTCTTTCGC ( <i>Sma</i> I site)   | 6294              | 5.1       |
| 6.1-R                                             | CTAGTCTAGACAAGATCATCGCCAATCCG ( <i>Xba</i> I site) | 7654              | 7.1       |
| <b>Primers to complement the mutant AH-3Δ7.1</b>  |                                                    |                   |           |
| 7.1-F2                                            | TCCCCCGGGGATGCTCAACAACGACCTC ( <i>Sma</i> I site)  | 8561              | 5' of 7.1 |
| 7.1-R2                                            | CTAGTCTAGAGCGAACAGGACATCAACTC ( <i>Xba</i> I site) | 7411              | 6.1       |
| <b>Primers to complement the mutant AH-3Δ2.2</b>  |                                                    |                   |           |
| 2.2-F                                             | AAAAGTACTGGCATAATCTCGGCCAG ( <i>Sca</i> I site)    | 2760              | 5' of 2.2 |
| 2.2-R                                             | CTAGTCTAGAGGGTTCTTCGGCTGTAGA ( <i>Xba</i> I site)  | 1503              | 1.2       |
| <b>Primers to complement the mutant AH-3Δ3.2</b>  |                                                    |                   |           |
| 3.2-F                                             | TCCCCCGGGAATTCGAGCATGGCCCGC ( <i>Sma</i> I site)   | 2896              | 5' of 3.2 |
| 3.2-R                                             | CTAGTCTAGAGCGATCACCCGGAAGACA ( <i>Xba</i> I site)  | 3888              | 4.2       |
| <b>Primers to complement the mutant AH-3Δ4.2</b>  |                                                    |                   |           |
| 4.2-F2                                            | TCCCCCGGGCTCCTTGCATTGGTGACAG ( <i>Sma</i> I site)  | 4874              | 5' of 4.2 |
| 4.2-R2                                            | CTAGTCTAGAGTCAAATACGCCGACCTCT ( <i>Xba</i> I site) | 3670              | 3.2       |
| <b>Primers to complement the mutant AH-3Δ1.3</b>  |                                                    |                   |           |
| 1.3-F                                             | AAAAGTACTCATCCATTTTGCCACCATT ( <i>Sca</i> I site)  | 1505              | 5' of 1.3 |
| 1.3-R                                             | CTAGTCTAGAGGTAGAGGCCAGCAGGTTA ( <i>Xba</i> I site) | 366               | 3' of 1.3 |
| <b>COMPLEMENTATION WITH pGEMT-easy</b>            |                                                    |                   |           |
| <b>Primers to complement <i>E. coli</i> CJB26</b> |                                                    |                   |           |
| 2.3-F                                             | GTGACAACAATCCCCGATG                                | 1405              | 1.3       |
| 2.3-R                                             | ATCAGCGCCAGATCAAAC                                 | 2503              | 3' of 2.3 |
| 1.2-F                                             | ACGCGTCGACCCGATCGTGCTGCAAGTG ( <i>Sal</i> I site)  | 1658              | 2.2       |
| 1.2-R                                             | ACGCGTCGACCACGACCTTCAGCGACTC ( <i>Sal</i> I site)  | 160               | 3' of 1.2 |

**Figure A.** Charge deconvoluted electrospray ionization mass spectra of the core oligosaccharides released by mild acid hydrolysis from the LPSs of *A. hydrophila* mutants. Figure 6D shows a higher-molecular-mass part of the spectrum; a lower-molecular-mass part contains ion peaks at  $m/z$  958.30 (major) and 1150.38 (minor). Schematic structures and the calculated molecular masses ( $M_r$ ) of the most representative compounds are shown in the insets.

**Figure B.** Charge deconvoluted electrospray ionization mass spectrum of the whole LPS of *A. hydrophila waaC* mutant. Schematic structure of the major compound and the calculated molecular mass ( $M_r$ ) are shown in the inset. 12:0, lauric acid; 3HO14:0, 3-hydroxymyristic acid.

Figure A

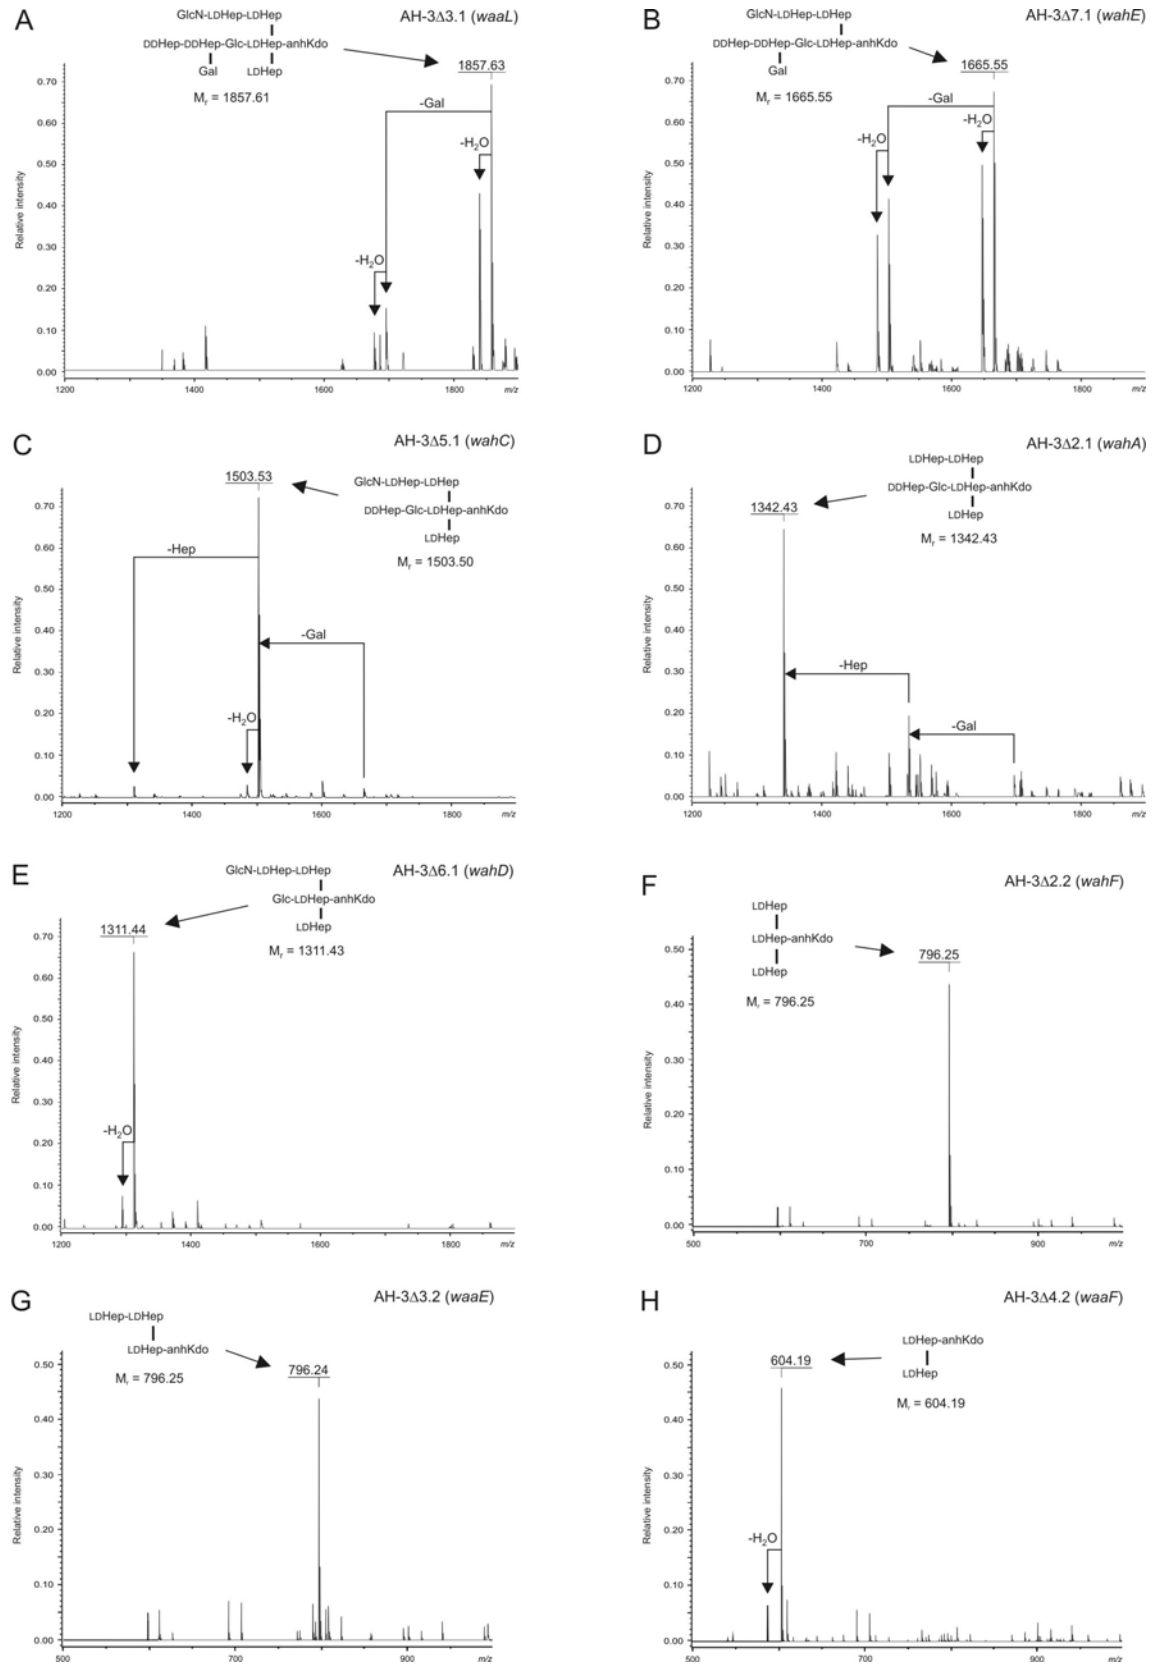

Figure B

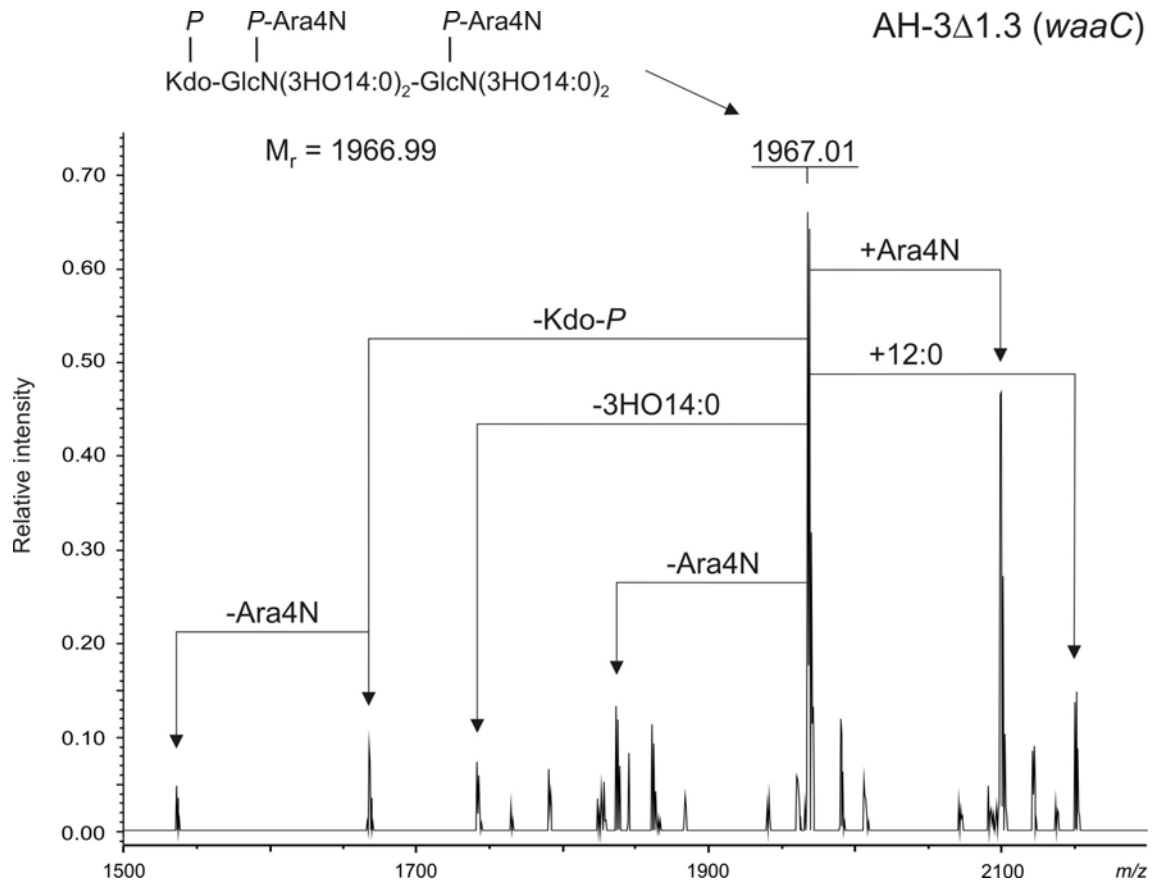

Supplement: jbacter_190_9_3176__1.pdf [file jbacter_190_9_3176__1.pdf]
